# Supplementary material for: [2.1.1]-(2,6)-Pyridinophane(L)-controlled alkane C–H bond cleavage: (L)PtMe2H+ as a precursor to the geometrically “tense” transient (L)PtMe+Electronic supplementary information (ESI) available: complete experimental and characterization data. See http://www.rsc.org/suppdata/nj/b3/b302055j/.
Source: Royal Society of Chemistry journal article supplement (doi:10.1039/b302055j), 2003-03-18
Supplement: b302055j.doc [file b302055j.doc]

**Supplemental Information Table**

**[2.1.1]-(2,6)-pyridinophane(L)-controlled Alkane C-H Bond Cleavage: (L)PtMe2H+ as a Precursor to the Geometrically “Tense” Transient (L)PtMe**

**Andrei N. Vedernikov, John C. Huffman and Kenneth G. Caulton**

**Experimental details:**

**General.** All manipulations were carried out under purified argon using standard Schlenk and glovebox techniques. Solvents were dried and distilled following standard protocols and stored in gas-tight bulbs under argon. All reagents for which a synthesis is not given are commercially available from Aldrich or Pressure Chemicals and were used as received without further purification. All NMR solvents were dried, vacuum-transferred and stored in an argon-filled glovebox.

[2.1.1]-(2,6)-pyridinophane and [PtMe2(L)] have been synthesized according to the published procedure.1

1H and 13C NMR spectra were recorded on Inova 700 spectrometer (1H 400 MHz; 13C 100.62 MHz). 1H and 13C NMR chemical shifts are reported in ppm and referenced to residual solvent resonance peaks. High-resolution mass spectra were obtained on a Kratos MS80 RFAQQ instrument.

**X-ray Structure Determination**. The sample consisted of well-formed colorless crystals sealed in an inert atmosphere. A typical crystal was removed from the container and a nearly equidimensional fragment was obtained by cleaving. The selected fragment was then affixed to a glass fiber using silicone grease and transferred to the Bruker SMART6000 CCD system where it was cooled to -158ºC using a gas-flow cooling system of local design. A set of initial frames indicated that the crystal was single. All sample manipulations were performed in inert atmosphere conditions.

The data were collected using 10-second frames with an omega scan of 0.30 degrees. Data were corrected for Lorentz and polarization effects and equivalent reflections averaged using the Bruker SAINT software as well as utility programs from the XTEL library. Due to the irregular shape of the crystal it was not possible to perform an analytical absorption correction, so the SADABS empirical algorithm was utilized. The data set consisted of typically eight-fold redundant data. The structure was solved using SHELXTL and Fourier techniques. Some disorder is present in the –CF3 groups, as well as in a CH2Cl2 solvent whcihc lies on a crystallographic symmetry element. Many of the hydrogen atoms were clearly visible in a difference Fourier, but there was no clear evidence of the location of the proposed hydride atom. For this reason, all hydrogen atoms were placed in fixed idealized positions and were included as isotropic contributors in the final cycles of refinement. A final difference Fourier was essentially featureless. There was one peak of 1.25e/A3 at the Pt metal site, and all other peaks were less than 0.51e/A3.

**Computational details.** Theoretical calculations in this work have been performed using density functional theory (DFT) method,2 specifically functional PBE,3 implemented in an original program package “Priroda”.4 In PBE calculations relativistic Stevens-Basch-Krauss (SBK) effective core potentials (ECP) 5 optimized for DFT-calculations have been used. Basis set was 311-split for main group elements with one additional polarization p-function for hydrogen, additional two polarization d-functions for elements of higher periods. Full geometry optimization has been performed without constraints on symmetry. For all species under investigation frequency analysis has been carried out. All minima have been checked for the absence of imaginary frequencies.

**Preparation of [PtMe2H(L)]BArF4 and its reactions with CH bond donors.** A 10 ml Schlenk flask equipped with a Kontes Teflon valve and magnetic stirbar was charged in an argon filled glovebox with 20 mg of NaBArF4 (22 mol), 10.3 mg of PtMe2(L) (20 mol), 0.6-0.3 ml of CD2Cl2 and equal volume of particular liquid alkane (n-pentane, cyclopentane, cyclohexane). The flask was then removed from the glovebox and immersed into an acetone bath cooled till -60oC. The Teflon valve was replaced for a serum cap and solution of 3.0 mg of HSO3CF3 in 0.1 ml of CD2Cl2 (20 mol) was added to the stirred suspension dropwise with a syringe. After 5 min. of stirring at ‑60oC the flask was removed from a bath. The reaction mixture was transferred into the glovebox and filtered into NMR Young tube. Then in the case of gaseous substrates to be reacted with PtMe2H(L)BArF4 (ethane, propane, n-butane) the liquid inside the NMR tube was frozen with liquid nitrogen, argon evacuated and 50-75 ml of gaseous alkane taken at 1 atm pressure and 298 K were condensed. The tube was cautiously warmed up. Exact molarity of alkanes was determined by NMR integration using signals of BArF4 as internal standard. Reactions were monitored by 1H NMR and spectra were taken every hour. In 7-8 h of a reaction at 21oC reactions were complete.

**[PtMe2H(L)]BArF4**

1H NMR (CD2Cl2, 20oC):

, ‑20.65 (s, 1*J*Pt-H = 1354 Hz, 1H, PtH), 1.27 (s, 2*J*Pt-H = 70 Hz, 6H, PtCH3), 3.49-3.55 (m, 2H, C2H4), 3.72-3.82 (m, 2H, C2H4), 4.06 (d, 2*J*H-H = 15.5 Hz, 2H, CH2), 5.00 (d, 2*J*H-H = 15.5 Hz, 2H, CH2), 7.26 (d, 3*J*H-H = 7.8 Hz, 2H, *meta*-CH, py), 7.31 (d, 3*J*H-H = 7.8 Hz, 2H, *meta*-CH, py), 7.47 (d, 3*J*H-H = 7.8 Hz, 2H, *meta*-CH, py), 7.50-7.53 (br s, 4H, *para*-CH, ArF), 7.61 (t, 3*J*H-H = 7.8 Hz, 2H, *para*-CH, py), 7.68-7.83 (br s, 8H, *ortho*-CH, ArF), 7.82 (t, 3*J*H-H = 7.8 Hz, 1H, *para*-CH, py)

13C NMR (CD2Cl2, ‑40oC):

‑18.61 (s, 1*J*Pt-C = 602 Hz, PtC), 36.94 (s, 3*J*Pt-C = 30 Hz, C2H4), 46.37 (s, 3*J*Pt-C = 17 Hz, CH2), 117.74 (m, *para*-C, BArF4), 124.70 (quart, 1*J*C‑F = 272.7 Hz, CF3, BArF4), 125.21 (*meta*-C, py), 126.63 (*meta*-C, py), 128.88 (quart, 2*J*C-F = 31.7 Hz, *ortho*-C, BArF4), 134.89 (br s, *ortho*-C, BArF4), 140.19, 141.17 (*para*-C, py), 154.64, 156.68, 160.38 (*ortho*-C, py), 161.92 (quart, 1*J*B-C = 50 Hz, B-C, BArF4)

DFT calculated structure of the cation **[PtMe2H(L)]+**:

Selected bond lengths, Å: Pt-C(42), 2.084; Pt-C(43), 2.085; Pt-H, 1.552; Pt-N(5), 2.272; Pt-N(14), 2.241; Pt-N(25), 2.240; and angles, degrees: N(5)-Pt-N(25), 82.3; N(25)-Pt-N(14), 87.0; N(25)-Pt-C(42), 94.4; N(25)-Pt-H, 97.4.

DFT calculated structure of the lowest energy cationic transient **[PtMe(2-L)]+**:

Hydrogen atoms are omitted. Selected bond lengths, Å: Pt-C(41), 2.032; Pt-N(5), 1.993; Pt-N(14), 3.026; Pt-N(25), 2.171; and angles, degrees: N(5)-Pt-N(25), 85.3; N(5)-Pt-C(41), 100.5.

The standard Gibbs energy of CH4 + **[PtMe(2-L)]+** at 298 K relative to the cation **[PtMe2H(L)]+** is +11 kcal/mol.

DFT calculated structure of the transition state for methane elimination from the cation **[PtMe2H(L)]+**:

Hydrogen atoms of the macrocycle and one of the methyls are omitted. Selected bond lengths, Å: Pt-C(42), 2.254; Pt-H(41), 1.652; C(42)-H(41), 1.303; Pt-N(5), 2.588; Pt-N(14), 2.149; Pt-N(25), 2.252.

The standard Gibbs energy of **[PtMe(MeH)(L)]+** at 298 K relative to the cation **[PtMe2H(L)]+** is +16 kcal/mol.

**[PtH(2-C2H4)(L)]BArF4**

1H NMR (CD2Cl2, ‑40oC):

, ‑27.49 (s, 1*J*Pt-H = 1093 Hz, 1H, PtH), 2.45-2.83 (m, 2*J*Pt-H = 72 Hz, 4H, CH2=CH2), 3.44-3.58 (m, 2H, C2H4), 3.76-3.88 (m, 1H, C2H4), 3.98 (d, 2*J*H-H = 14.0 Hz, 1H, CH2), 4.32 (d, 2*J*H-H = 14.0 Hz, 1H, CH2), 4.34 (d, 2*J*H-H = 14.0 Hz, 1H, CH2), 4.92 (d, 2*J*H-H = 14.0 Hz, 1H, CH2), 4.82-4.95 (m, 1H, C2H4), 7.06 (d, 3*J*H-H = 7.8 Hz, 1H, *meta*-CH, py), 7.32 (d, 3*J*H-H = 7.8 Hz, 1H, *meta*-CH, py), 7.42 (d, 3*J*H-H = 7.8 Hz, 2H, *meta*-CH, py), 7.51 (d, 3*J*H-H = 7.8 Hz, 1H, *meta*-CH, py), 7.55 (d, 3*J*H-H = 7.8 Hz, 1H, *meta*-CH, py), 7.50-7.53 (br s, 4H, *para*-CH, ArF), 7.53 (t, 3*J*H-H = 7.8 Hz, 1H, *para*-CH, py), 7.68-7.83 (br s, 8H, *ortho*-CH, ArF), 7.69 (t, 3*J*H-H = 7.8 Hz, 1H, *para*-CH, py), 7.80 (t, 3*J*H-H = 7.8 Hz, 1H, *para*-CH, py)

13C NMR (CD2Cl2, ‑40oC):

22.00 (s, 2*J*Pt-C = 325 Hz, CH2=CH2), 35.47 (s, 3*J*Pt-C = 12 Hz, *C*H2CH2), 36.98 (s, 3*J*Pt-C = 15 Hz, CH2*C*H2), 49.43 (s, 3*J*Pt-C = 52 Hz, CH2), 50.42 (s, 3*J*Pt-C = 37 Hz, CH2), 117.74 (m, *para*-C, BArF4), 123.22, 123.50, 123.99 (*meta*-C, py), 124.70 (quart, 1*J*C‑F = 272.7 Hz, CF3, BArF4), 125.44 (*meta*-C, py), 127.15 (*meta*-C, py), 128.88 (quart, 2*J*C-F = 31.7 Hz, *ortho*-C, BArF4), 134.89 (br s, *ortho*-C, BArF4), 139.58, 139.96, 140.74 (*para*-C, py), 154.50, 155.35, 156.27, 156.82, 160.36, 161.72 (*ortho*-C, py), 161.92 (quart, 1*J*B-C = 50 Hz, B-C, BArF4)

Unpublished X-ray diffraction data for homologous compound, [PtMe(2-C2H4)(L)]BArF4, obtained by us are consistent with unsymmetrical 3-mode of binding of L to Pt(C2H4) fragment. Taken together, all the data are consistent with the following structure for [PtH(2-C2H4)(L)]BArF4, analogous to that of cyclohexene adduct (see ORTEP drawing in the main text):

**[PtH(2-C3H6)(L)]BArF4**

1H NMR (CD2Cl2, ‑30oC), mixture of two diastereomers:

, ‑27.59 (s, 1*J*Pt-H = 1158 Hz, PtH), ‑27.50 (s, 1*J*Pt-H = 1141 Hz, PtH), 1.41 (d, 3*J*H-H = 6 Hz, 3*J*Pt-H = 78 Hz, CH3), 1.60 (d, 3*J*H-H = 6 Hz, 3*J*Pt-H = 76 Hz, CH3), 2.28 (d, 3*J*H-H = 7.8 Hz, 2*J*Pt-H = 79 Hz, CH2=), 2.65 (d, 3*J*H-H = 7.8 Hz, 2*J*Pt-H = 90 Hz, CH2=), 2.28 (d, 3*J*H-H = 9.9 Hz, 2*J*Pt-H = 58 Hz, CH2=), 2.89 (d, 3*J*H-H = 9.9 Hz, 2*J*Pt-H = 63 Hz, CH2=), 3.07 (m, 2*J*Pt-H = 80 Hz, -CH=), 3.41 (m, 2*J*Pt-H = 80 Hz, -CH=), 3.46-3.59 (m, C2H4), 3.75-3.90 (m, C2H4), 4.00 (d, 2*J*H-H = 14.0 Hz, CH2), 4.01 (d, 2*J*H-H = 14.0 Hz, CH2), 4.29 (d, 2*J*H-H = 14.0 Hz, CH2), 4.77-4.96 (m, C2H4), 4.86 (d, 2*J*H-H = 14.0 Hz, CH2), 4.99 (d, 2*J*H-H = 14.0 Hz, CH2), 7.05 (d, 3*J*H-H = 7.8 Hz, *meta*-CH, py), 7.30 (d, 3*J*H-H = 7.8 Hz, *meta*-CH, py), 7.32 (d, 3*J*H-H = 7.8 Hz, *meta*-CH, py), 7.40 (d, 3*J*H-H = 7.8 Hz, *meta*-CH, py), 7.42 (d, 3*J*H-H = 7.8 Hz, *meta*-CH, py), 7.47 (d, 3*J*H-H = 7.8 Hz, *meta*-CH, py), 7.50-7.54 (br s, 4H, *para*-CH, ArF), 7.51 (t, 3*J*H-H = 7.8 Hz, *para*-CH, py), 7.52 (t, 3*J*H-H = 7.8 Hz, *para*-CH, py), 7.67 (t, 3*J*H-H = 7.8 Hz, *para*-CH, py), 7.69 (t, 3*J*H-H = 7.8 Hz, *para*-CH, py), 7.68-7.75 (br s, 8H, *ortho*-CH, ArF), 7.77 (t, 3*J*H-H = 7.8 Hz, *para*-CH, py), 7.78 (t, 3*J*H-H = 7.8 Hz, *para*-CH, py)

1D NOE 1H experiments (CD2Cl2, ‑30oC):

when peak at 1.60 (CH3) was irradiated, intensity of only one of two high-field resonances increased by 20%, that at ‑27.59 ppm (PtH).

Irradiation of a peak at 1.41 (CH3 of another diastereoisomer) lead to 15% increase of intensity of another of two high-field resonances, that at ‑27.50 (PtH).

These data prove *cis*-orientation of Me and Pt‑H fragments in both isomers. All NMR data are consistent with unsymmetrical 3-binding of L relative to Pt‑H fragment as in analogous ethene and cyclohexene adducts (see ORTEP drawing in the main text):

and

13C NMR (CD2Cl2, ‑30oC), mixture of two diastereomers:

, 24.18, 24.93 (CH3), 26.76, 26.83 (s, 1*J*Pt-C = 324 Hz, =CH2), 35.53, 35.72, 36.42, 36.64 (CH2CH2), 40.08 (s, 1*J*Pt-C = 351 Hz, -CH=), 49.28, 49.36, 50.02, 50.05 (CH2), 117.74 (m, *para*-C, BArF4), 123.03, 123.20, 123.33, 123.49, 123.84, 123.94, 123.97, 124.70 (quart, 1*J*C‑F = 272.7 Hz, CF3, BArF4), 125.33, 125.44 (*meta*-C, py), 127.25, 127.32 (*meta*-C, py), 128.88 (quart, 2*J*C-F = 31.7 Hz, *ortho*-C, BArF4), 134.89 (br s, *ortho*-C, BArF4), 139.48, 139.52, 139.78, 139.82, 140.57 (*para*-C, py), 154.50, 154.64, 155.55, 156.11, 156.35, 156.66, 156.76, 160.43, 160.47, 161.49, 161.55 (*ortho*-C, py), 161.92 (quart, 1*J*B-C = 50 Hz, B-C, BArF4)

**[PtH(2-1-C4H8)(L)]BArF4**

1H NMR (CD2Cl2, ‑30oC), mixture of two diastereomers:

, ‑27.69 (s, 1*J*Pt-H = 1143 Hz, PtH), ‑27.57 (s, 1*J*Pt-H = 1137 Hz, PtH), 0.96 (t, 3*J*H-H = 7.3 Hz, CH3), 1.06 (t, 3*J*H-H = 7.3 Hz, CH3), 1.32-1.46 (m, CH2Me), 1.51-1.66 (m, CH2Me), 2.23 (d, 3*J*H-H = 7.7 Hz, 2*J*Pt-H = 86 Hz, CH2=), 2.63 (d, 3*J*H-H = 9.6 Hz, 2*J*Pt-H = 76 Hz, CH2=), 2.64 (d, 3*J*H-H = 7.7 Hz, 2*J*Pt-H = 72 Hz, CH2=), 2.89 (d, 3*J*H-H = 9.6 Hz, 2*J*Pt-H = 62 Hz, CH2=), 3.06 (m, 2*J*Pt-H = 80 Hz, -CH=), 3.38-3.57 (m, C2H4), 3.41 (m, 2*J*Pt-H = 80 Hz, -CH=), 3.77-3.92 (m, C2H4), 4.01 (d, 2*J*H-H = 13.8 Hz, CH2), 4.03 (d, 2*J*H-H = 13.8 Hz, CH2), 4.29 (d, 2*J*H-H = 13.8 Hz, CH2), 4.30 (d, 2*J*H-H = 13.9 Hz, CH2), 4.83-4.99 (m, C2H4), 4.92 (d, 2*J*H-H = 13.9 Hz, CH2), 4.99 (d, 2*J*H-H = 13.9 Hz, CH2), 7.04 (d, 3*J*H-H = 7.8 Hz, *meta*-CH, py), 7.30 (d, 3*J*H-H = 7.8 Hz, *meta*-CH, py), 7.37 (d, 3*J*H-H = 7.8 Hz, *meta*-CH, py), 7.38 (d, 3*J*H-H = 7.8 Hz, *meta*-CH, py), 7.39 (d, 3*J*H-H = 7.8 Hz, *meta*-CH, py), 7.40 (d, 3*J*H-H = 7.8 Hz, *meta*-CH, py), 7.48 (d, 3*J*H-H = 7.8 Hz, *meta*-CH, py), 7.49 (d, 3*J*H-H = 7.8 Hz, *meta*-CH, py), 7.52-7.55 (br s, 4H, *para*-CH, ArF), 7.50 (t, 3*J*H-H = 7.8 Hz, *para*-CH, py), 7.51 (t, 3*J*H-H = 7.8 Hz, *para*-CH, py), 7.65 (t, 3*J*H-H = 7.8 Hz, *para*-CH, py), 7.66 (t, 3*J*H-H = 7.8 Hz, *para*-CH, py), 7.68-7.75 (br s, 8H, *ortho*-CH, ArF), 7.75 (t, 3*J*H-H = 7.8 Hz, *para*-CH, py), 7.76 (t, 3*J*H-H = 7.8 Hz, *para*-CH, py).

1D NOE 1H experiments (CD2Cl2, ‑30oC):

when peak at ‑27.69 (PtH) was irradiated, intensity of signal of only one of two CH3 groups increased by 10%, that at 1.06 (t, 3*J*H-H = 7.3 Hz, CH3). Also increased intensities of one of four signals of olefin CH2= groups at 2.63 (d, 3*J*H-H = 9.6 Hz, 15%), protons belonging to two distinct CH2 bridges, at 4.01 (d, 2*J*H-H = 13.8 Hz, 20%) and at 4.30 (d, 2*J*H-H = 13.9 Hz, 10%), and only one of four protons of C2H4 bridge at 3.45 (m, 5%) so indicating unsymmetrical binding of L relative Pt‑H fragment in this isomer with Et *cis*- to Pt‑H fragment.

This conclusion is confirmed by observation of increase of intensity of only one of high-field resonances at ‑27.69 (PtH, 10%), when peak at 1.06 (CH3) was irradiated.

Irradiation of a peak at ‑27.57 (PtH of another isomer) lead to 10% increase of intensity of another of two CH3 resonances located at 0.96 (t, 3*J*H-H = 7.3 Hz, CH3). Also increased intensities of one of four signals of olefin CH2= groups at 2.89 (d, 3*J*H-H = 9.6 Hz, 15%), protons belonging to two distinct CH2 bridges, at 4.03 (d, 2*J*H-H = 13.8 Hz, 20%) and at 4.29 (d, 2*J*H-H = 13.8 Hz, 10%).

In accordance with these observations, when peak at 0.96 (CH3) was irradiated, intensity of only one of high-field resonances at ‑27.57 (PtH, 10%) increased.

These data prove *cis*-orientation of Et and Pt‑H fragments in both isomers and unsymmetrical 3-binding of L relative to Pt‑H fragment as in analogous ethene and cyclohexene adducts (see ORTEP drawing in the main text):

and

13C NMR (CD2Cl2, ‑30oC), mixture of two diastereomers:

, 16.50, 17.03 (CH3), 25.56 (s, 1*J*Pt-C = 328 Hz, =CH2), 32.55, 33.19 (*C*H2CH=), 35.48, 35.63, 36.39, 36.68 (CH2CH2), 47.84, 48.34 (-CH=), 49.33, 49.43, 50.07 (CH2), 117.74 (m, *para*-C, BArF4), 123.00, 123.26, 123.33, 123.47, 123.82, 123.88, 123.94, 123.98(*meta*-C, py), 124.70 (quart, 1*J*C‑F = 272.7 Hz, CF3, BArF4), 125.24, 125.46 (*meta*-C, py), 127.13, 127.29 (*meta*-C, py), 128.88 (quart, 2*J*C-F = 31.7 Hz, *ortho*-C, BArF4), 134.89 (br s, *ortho*-C, BArF4), 139.44, 139.55, 139.76, 139.79, 140.57 (*para*-C, py), 154.46, 154.67, 155.41, 155.56, 156.08, 156.44, 156.65, 156.78, 160.49, 161.49, 161.64 (*ortho*-C, py), 161.92 (quart, 1*J*B-C = 50 Hz, B-C, BArF4)

**[PtH(2-*cis*-2-C4H8)(L)]BArF4**

1H NMR (CD2Cl2, ‑30oC):

-27.69 (s, 1*J*Pt‑H = 1207 Hz, 1H, Pt‑H); 1.42 (d, 3*J*H‑H = 6.5 Hz, 3*J*Pt‑H = 80 Hz, 3H, CH3), 1.60 (d, 3*J*H‑H = 6.5 Hz, 3*J*Pt‑H = 76 Hz, 3H, CH3), 3.16 (m, 1H, CH=), 3.39 (m, 2*J*Pt-H = 70 Hz, -CH=), 3.44-3.54 (m, C2H4), 3.98-4.07 (m, C2H4), 3.99 (d, 2*J*H‑H = 14.4 Hz, 1H, CH2), 4.32 (d, 2*J*H‑H = 14.4 Hz, 1H, CH2), 4.69 (d, 2*J*H‑H = 14.4 Hz, 1H, CH2), 4.85-4.99 (m, C2H4), 4.94 (d, 2*J*H‑H = 14.4 Hz, 1H, CH2), 7.07 (d, 3*J*H-H = 7.8 Hz, 1H, *meta*-CH, py), 7.32 (d, 3*J*H-H = 7.8 Hz, 1H, *meta*-CH, py), 7.34 (d, 3*J*H-H = 7.8 Hz, 1H, *meta*-CH, py), 7.38 (d, 3*J*H-H = 7.8 Hz, 1H, *meta*-CH, py), 7.44 (d, 3*J*H-H = 7.8 Hz, 1H, *meta*-CH, py), 7.48 (d, 3*J*H-H = 7.8 Hz, 1H, *meta*-CH, py), 7.55 (d, 3*J*H-H = 7.8 Hz, 1H, *meta*-CH, py), 7.50-7.54 (br s, 4H, *para*-CH, ArF), 7.66 (t, 3*J*H-H = 7.8 Hz, 1H, *para*-CH, py), 7.67-7.73 (br s, 8H, *ortho*-CH, ArF), 7.77 (t, 3*J*H-H = 7.8 Hz, 1H, *para*-CH, py).

1D NOE 1H experiments (CD2Cl2, ‑30oC):

When either peak of CH3 at 1.42 or 1.60 was irradiated, intensity of PtH signal at ‑28.69 (PtH) increased by 10-15%.

These data prove *cis*-orientation of both Me and Pt‑H fragments and are consistent with 3-binding mode of L to Pt(olefin) fragment as in analogous cyclohexene adduct (see ORTEP drawing in the main text):

Identity of this *cis*-2-butene adduct has also been confirmed by its independent synthesis from *cis*-2-butene by heating the olefin for 1 h at 86oC with LPtMeH2BArF4 (source of transient LPtH+) 6. When *cis*-2-butene was heated with LPtMeH2BArF4, partial *trans*-/*cis*-isomerization of the olefin occurred but the major adduct observed (80%) was that of *cis*-2-butene. When the adduct was exposed to CO (1 atm) and heated at 100oC in sealed NMR tube in CD2Cl2 solution for 23 h, *cis*-2-butene was liberated, 1.59 (m, 6H, Me), 5.43 (m, 2H, CH=).

**[PtH(2-*trans*-2-C4H8)(L)]BArF4**

1H NMR (CD2Cl2, ‑30oC), selected data for mixture of two diastereomers:

-27.88 (s, 1*J*Pt‑H = 1150 Hz, Pt‑H), -28.34 (s, 1*J*Pt‑H = 1165 Hz, Pt‑H), 1.36 (d, 3*J*H‑H = 6.4 Hz, 3*J*Pt‑H = 77 Hz, 3H, CH3), 1.42 (d, 3*J*H‑H = 6.5 Hz, 3*J*Pt‑H = 80 Hz, 3H, CH3), 1.48 (d, 3*J*H‑H = 6.4 Hz, 3*J*Pt‑H = 79 Hz, 3H, CH3), 1.60 (d, 3*J*H‑H = 6.5 Hz, 3*J*Pt‑H = 76 Hz, 3H, CH3).

Identity of this *trans*-2-butene adduct has been confirmed by its independent synthesis from *trans*-2-butene by heating the olefin for 1 h at 86oC with LPtMeH2BArF4 (source of transient LPtH+) 6 as well as by olefin substitution with CO.

When *trans*-2-butene was heated with LPtMeH2BArF4, partial *trans*-/*cis*-isomerization of the olefin occurred and significant accumulation of *cis*-2-butene adduct was observed (80%) along with *trans*-2-butene adduct.

When mixture of *cis*- and *trans-*2-butene adducts obtained by n-butane dehydrogenation with LPtMe2H+ was exposed to CO (1 atm) at r.t. for 24 h, *trans*-2-butene was liberated, 1.61 (m, 6H, Me), 5.41 (m, 2H, CH=) and adduct of *cis*-2-butene persisted. Along with *trans*-2-butene, some products of decomposition of starting LPtH(olefin)+ complex were observed, with major product presumably LPtH(CO)+ (1H NMR in CD2Cl2 solution, 20oC: ‑15.98 (s, 1*J*Pt‑H = 1135 Hz, PtH), 3.34 (m, 2H, C2H4), 4.11 (m, 2H, C2H4), 4.36 (d, 2*J*H‑H = 14.2 Hz, 2H, CH2), 4.87 (d, 2*J*H‑H = 14.2 Hz, 2H, CH2), 7.22 (d, 3*J*H‑H = 7.8 Hz, 2H, *meta*-CH, py), 7.28 (d, 3*J*H‑H = 7.8 Hz, 2H, *meta*-CH, py), 7.34 (d, 3*J*H‑H = 7.8 Hz, 2H, *meta*-CH, py), 7.65 (t, 3*J*H‑H = 7.8 Hz, 2H, *para*-CH, py), 7.22 (t, 3*J*H‑H = 7.8 Hz, 1H, *para*-CH, py)).

NMR data are consistent with unsymmetrical 3-binding of L relative to Pt‑H as in analogous cyclohexene adduct (see ORTEP drawing in the main text):

or

**[PtH(2-C5H8)(L)]BArF4**

1H NMR (CD2Cl2, ‑30oC):

, ‑26.97 (s, 1*J*Pt-H = 1171 Hz, 1H, PtH), 1.10-1.24 (m, 1H, CH2), 1.42-1.61 (m, 2H, CH2), 1.61-1.73 (m, 1H, CH2), 1.73-2.02 (m, 2H, CH2), 3.04 (m, 2*J*Pt-H = 88 Hz, 1H, -CH=), 3.44-3.53 (m, 2H, C2H4), 3.56 (m, 2*J*Pt-H = 80 Hz, 1H, -CH=), 3.82-3.94 (m, 1H, C2H4), 4.04 (d, 2*J*H-H = 13.4 Hz, 1H, CH2), 4.28 (d, 2*J*H-H = 13.4 Hz, 1H, CH2), 4.32 (d, 2*J*H-H = 14.0 Hz, 1H, CH2), 4.93-5.03 (m, 1H, C2H4), 5.09 (d, 2*J*H-H = 14.0 Hz, 1H, CH2), 7.07 (d, 3*J*H-H = 7.8 Hz, 1H, *meta*-CH, py), 7.32 (d, 3*J*H-H = 7.8 Hz, 1H, *meta*-CH, py), 7.37 (d, 3*J*H-H = 7.8 Hz, 1H, *meta*-CH, py), 7.39 (d, 3*J*H-H = 7.8 Hz, 1H, *meta*-CH, py), 7.47 (d, 3*J*H-H = 7.8 Hz, 1H, *meta*-CH, py), 7.51 (d, 3*J*H-H = 7.8 Hz, 1H, *meta*-CH, py), 7.50-7.53 (br s, 4H, *para*-CH, ArF), 7.53 (t, 3*J*H-H = 7.8 Hz, 1H, *para*-CH, py), 7.67 (t, 3*J*H-H = 7.8 Hz, 1H, *para*-CH, py), 7.68-7.83 (br s, 8H, *ortho*-CH, ArF), 7.77 (t, 3*J*H-H = 7.8 Hz, 1H, *para*-CH, py)

NMR data are consistent with unsymmetrical 3-binding of L relative to Pt‑H as in analogous cyclohexene adduct (see ORTEP drawing in the main text).

13C NMR (CD2Cl2, ‑30oC):

, 21.72 (s, 3*J*Pt-C = 38 Hz, CH2*C*H2CH2), 32.10 (s, 2*J*Pt-C = 16 Hz, *C*H2CH=), 32.44 (s, 2*J*Pt-C = 18 Hz, *C*H2CH=), 35.56, 36.78 (pyCH2CH2py), 47.28 (s, 1*J*Pt-C = 384 Hz, -CH=), 48.22 (s, 1*J*Pt-C = 380 Hz, -CH=), 49.28 (s, 3*J*Pt-C = 48 Hz, CH2py), 49.94 (s, 3*J*Pt-C = 38 Hz, CH2py), 117.74 (m, *para*-C, BArF4), 123.02, 123.31, 123.77, 123.83 (*meta*-C, py), 124.70 (quart, 1*J*C‑F = 272.7 Hz, CF3, BArF4), 125.44 (*meta*-C, py), 127.34 (*meta*-C, py), 128.88 (quart, 2*J*C-F = 31.7 Hz, *ortho*-C, BArF4), 134.89 (br s, *ortho*-C, BArF4), 139.44, 139.68, 140.45 (*para*-C, py), 154.54, 155.56, 156.28, 157.03, 160.33, 161.50 (*ortho*-C, py), 161.92 (quart, 1*J*B-C = 50 Hz, B-C, BArF4)

**[PtH(2-C6H10)(L)]BArF4**

1H NMR (CD2Cl2, ‑30oC):

, ‑27.20 (s, 1*J*Pt-H = 1181 Hz, 1H, PtH), 1.12-1.32 (m, 2H, CH2), 1.45-1.66 (m, 2H, CH2), 1.75-2.32 (m, 4H, CH2), 3.09 (m, 2*J*Pt-H = 90 Hz, 1H, -CH=), 3.43-3.57 (m, 2H, C2H4), 3.48 (m, 2*J*Pt-H = 88 Hz, 1H, -CH=), 3.75-3.93 (m, 1H, C2H4), 4.04 (d, 2*J*H-H = 13.5 Hz, 1H, CH2), 4.28 (d, 2*J*H-H = 13.5 Hz, 1H, CH2), 4.31 (d, 2*J*H-H = 14.0 Hz, 1H, CH2), 4.92-5.05 (m, 1H, C2H4), 5.03 (d, 2*J*H-H = 14.0 Hz, 1H, CH2), 7.03 (d, 3*J*H-H = 7.8 Hz, 1H, *meta*-CH, py), 7.29 (d, 3*J*H-H = 7.8 Hz, 1H, *meta*-CH, py), 7.37 (d, 3*J*H-H = 7.8 Hz, 1H, *meta*-CH, py), 7.38 (d, 3*J*H-H = 7.8 Hz, 1H, *meta*-CH, py), 7.46 (d, 3*J*H-H = 7.8 Hz, 1H, *meta*-CH, py), 7.49 (t, 3*J*H-H = 7.8 Hz, 1H, *para*-CH, py), 7.50 (d, 3*J*H-H = 7.8 Hz, 1H, *meta*-CH, py), 7.51-7.56 (br s, 4H, *para*-CH, ArF), 7.65 (t, 3*J*H-H = 7.8 Hz, 1H, *para*-CH, py), 7.69-7.78 (br s, 8H, *ortho*-CH, ArF), 7.75 (t, 3*J*H-H = 7.8 Hz, 1H, *para*-CH, py)

NMR data are consistent with unsymmetrical 3-binding of L relative to Pt‑H (see ORTEP drawing in the main text).

13C NMR (CD2Cl2, ‑30oC):

, 21.69, 21.82 (*C*H2CH2CH=), 28.26, 28.84 (*C*H2CH=), 35.62, 36.34 (pyCH2CH2py), 41.60, 41.67 (s, 1*J*Pt-C = 348 Hz, -CH=), 49.22 (s, 3*J*Pt-C = 49 Hz, CH2py), 49.86 (s, 3*J*Pt-C = 46 Hz, CH2py), 117.74 (m, *para*-C, BArF4), 123.04, 123.28, 123.78 (*meta*-C, py), 124.70 (quart, 1*J*C‑F = 272.7 Hz, CF3, BArF4), 125.42 (*meta*-C, py), 126.05 (m, BArF4), 127.28 (*meta*-C, py), 128.88 (quart, 2*J*C-F = 31.7 Hz, *ortho*-C, BArF4), 134.89 (br s, *ortho*-C, BArF4), 139.37, 139.61, 140.37 (*para*-C, py), 154.59, 155.59, 156.24, 156.81, 160.29, 161.38 (*ortho*-C, py), 161.94 (quartet, 1*J*B-C = 50 Hz, B-C, BArF4), 161.92 (quart, 1*J*B-C = 50 Hz, B-C, BArF4)

**References**

( 1 ) Vedernikov, A.N.; Huffmann, J.C.; Caulton, K.G. *Inorg. Chem.*, **2002**, *41*, 6867.

( 2 ) Parr, R.G.; Yang, W. *Density-functional theory of atoms and molecules*; Oxford university press: Oxford, 1989.

( 3 ) Perdew, J.P. ; Burke, K.; Ernzerhof, M. *Phys. Rev. Lett.* **1996**, *77*, 3865.

( 4 ) Ustynyuk, Yu.A.; Ustynyuk, L.Yu.; Laikov, D.N.; Lunin, V.V. *J. Organomet. Chem*. **2000**, *597*, 182.

( 5 ) Stevens, W.J.; Basch, H.; Krauss, M. *J. Chem. Phys*. **1984**, *81*, 6026; Stevens, W.J.; Basch, H.; Krauss, M.; Jasien, P. *Can. J. Chem*. **1992**, *70*, 612; Cundari, T.R.; Stevens, W.J. *J. Chem. Phys*. **1993**, *98*. 5555.

( 6 ) Vedernikov, A.N.; Caulton K.G. *Angew. Chem. Int. Edit. Engl.* **2002**, *41*, 4102.

Table S1

Crystal Data

Empirical Formula: C57.5H41BClF24N3Pt

Color of Crystal: colorless

Crystal Dimensions were: 0.30 x0.24 x0.12 mm.

Space Group: C2/c

Cell Dimensions (at -158. C; 8762 peaks)

a = 39.2410(14) Å

b = 12.4804(5)

c = 24.5612(9)

beta = 113.1292(9)º

Z (Molecules/cell): 4

Volume: 11094.50

Calculated Density: 1.762

Wavelength: 0.71073

Molecular Weight: 2942.57

F(000): 5784

Linear Absorption Coefficient: 26.914

Total number of intensities integrated =178586

Number of unique intensities = 12755

Number with I > 0.0 = 12549

Number with I > 2.33*sigma(I) = 10641

R for Averaging of 12721 unique

intensities observed more than once = 0.026

Final residuals are:

R(F) = 0.0336

Rw(F) = 0.0388

Goodness of Fit for the last cycle = 1.541

Maximum delta/sigma for last cycle = 0.00

Table S2: Fractional Coordinates and Isotropic Thermal Parameters

Atom x y z Biso

PT(1) 1674.9(0) 4511.0(1) 2895.7(0) 21

N(2) 1584(1) 5657(2) 3505(1) 25

C(3) 1536(1) 5400(4) 3998(2) 38

C(4) 1509(1) 6234(5) 4383(2) 53

C(5) 1527(1) 7262(5) 4226(2) 56

C(6) 1564(1) 7505(4) 3714(2) 48

C(7) 1586(1) 6705(3) 3369(2) 34

C(8) 1604(1) 6966(3) 2752(2) 44

C(9) 1271(1) 6532(3) 2230(2) 31

C(10) 1002(1) 7182(3) 1835(2) 36

C(11) 704(1) 6718(3) 1387(2) 37

C(12) 680(1) 5619(3) 1349(2) 34

C(13) 952(1) 5008(3) 1753(1) 28

N(14) 1247(1) 5456(2) 2189(1) 25

C(15) 934(1) 3780(3) 1766(2) 37

C(16) 898(1) 3370(3) 2331(2) 33

C(17) 583(1) 2851(3) 2294(2) 42

C(18) 563(1) 2520(3) 2808(2) 49

C(19) 841(1) 2697(4) 3342(2) 48

C(20) 1160(1) 3244(3) 3349(2) 39

N(21) 1182(1) 3583(2) 2852(1) 27

C(22) 1484(1) 3382(5) 3901(2) 61

C(23) 1510(2) 4341(5) 4227(3) 66

C(24) 2198(1) 4054(3) 3515(2) 32

C(25) 2227(1) 4965(3) 3174(2) 32

C(26) 2429(1) 4884(3) 2755(2) 36

C(27) 2675(1) 3880(3) 2892(2) 39

C(28) 2474(1) 2899(3) 2949(2) 36

C(29) 2372(1) 3010(3) 3486(2) 36

B(30) -1194(1) 9954(3) 4672(1) 19

C(31) -932(1) 10716(2) 5219(1) 18

C(32) -809(1) 11720(2) 5118(1) 19

C(33) -628(1) 12424(2) 5570(1) 22

C(34) -562(1) 12163(3) 6152(1) 26

C(35) -681(1) 11185(3) 6262(1) 27

C(36) -861(1) 10476(2) 5811(1) 23

C(37) -504(1) 13490(3) 5448(2) 29

F(38) -641(1) 13757(2) 4882(1) 51

F(39) -145(1) 13563(2) 5621(2) 77

F(40) -604(1) 14290(2) 5714(1) 62

C(41) -624(2) 10884(3) 6879(2) 49

F(42) -449(1) 10001(2) 7068(1) 39

F(43) -848(2) 11144(6) 7054(3) 52

F(44) -270(2) 11517(4) 7291(2) 50

C(45) -1105(1) 10167(2) 4083(1) 19

C(46) -1367(1) 10341(2) 3512(1) 21

C(47) -1264(1) 10457(2) 3030(1) 22

C(48) -896(1) 10386(2) 3104(1) 23

C(49) -633(1) 10186(2) 3667(1) 20

C(50) -735(1) 10095(2) 4142(1) 20

C(51) -1558(1) 10629(3) 2422(1) 27

F(52) -1849(1) 11148(3) 2436(1) 80

F(53) -1444(1) 11176(2) 2074(1) 60

F(54) -1694(1) 9717(2) 2162(1) 53

C(55) -241(1) 10002(3) 3740(1) 25

F(56) -115(1) 10764(2) 3482(1) 40

F(57) -206(1) 9083(2) 3493(1) 42

F(58) -4.6(5) 9961(2) 4303(1) 32

C(59) -1110(1) 8675(2) 4792(1) 19

C(60) -1371(1) 7899(2) 4476(1) 21

C(61) -1287(1) 6818(2) 4503(1) 21

C(62) -930(1) 6459(2) 4837(1) 22

C(63) -666(1) 7201(2) 5155(1) 21

C(64) -755(1) 8284(2) 5138(1) 20

C(65) -1579(1) 6049(3) 4142(1) 27

F(66) -1707(1) 6262(2) 3563(1) 40

F(67) -1463(1) 5038(2) 4200(1) 54

F(68) -1874(1) 6074(2) 4278(1) 42

C(69) -282(1) 6839(3) 5514(2) 28

F(70) -23(1) 7555(2) 5530(1) 43

F(71) -193(1) 5926(2) 5322(1) 34

F(72) -227(1) 6655(2) 6084(1) 48

C(73) -1612(1) 10287(2) 4603(1) 21

C(74) -1782(1) 11242(2) 4327(1) 22

C(75) -2110(1) 11609(3) 4348(1) 25

C(76) -2282(1) 11046(3) 4653(1) 28

C(77) -2119(1) 10102(3) 4936(1) 26

C(78) -1793(1) 9742(2) 4910(1) 23

C(79) -2269(1) 12643(3) 4043(2) 32

F(80) -2422(1) 12528(2) 3466(1) 79

F(81) -2553(1) 12973(2) 4165(2) 81

F(82) -2041(1) 13406(2) 4164(2) 74

C(83) -2285(1) 9494(3) 5293(2) 34

F(84) -2638(1) 9733(3) 5158(1) 70

F(85) -2278(1) 8456(2) 5216(1) 75

F(86) -2122(1) 9681(2) 5858(1) 56

C(87) 0* 5052(10) 2500* 167

CL(88) 536(1) 5600(2) 2801(1) 58

CL(89) 244(1) 5800(2) 2447(2) 67

F(90) -611(2) 11623(4) 7226(2) 52

F(91) -1003(1) 10386(5) 6836(2) 50

H(1) 148* 607* 473* 69

H(2) 151* 784* 447* 64

H(3) 158* 824* 360* 56

H(4) 161* 772* 270* 52

H(5) 182* 665* 273* 52

H(6) 102* 794* 188* 46

H(7) 52* 715* 111* 47

H(8) 48* 529* 105* 44

H(9) 73* 355* 143* 46

H(10) 115* 350* 175* 46

H(11) 38* 273* 193* 53

H(12) 35* 216* 279* 58

H(13) 82* 243* 369* 55

H(14) 148* 278* 416* 68

H(15) 170* 332* 382* 68

H(16) 171* 426* 459* 74

H(17) 129* 435* 430* 74

H(18) 223* 424* 391* 41

H(19) 228* 561* 340* 42

H(20) 225* 484* 236* 45

H(21) 258* 550* 280* 45

H(22) 276* 378* 258* 49

H(23) 288* 399* 326* 49

H(24) 225* 282* 259* 46

H(25) 262* 228* 299* 46

H(26) 259* 292* 383* 45

H(27) 220* 245* 347* 45

H(28) -85* 1192* 472* 29

H(29) -44* 1265* 646* 36

H(30) -94* 981* 590* 32

H(31) -162* 1038* 345* 30

H(32) -83* 1048* 278* 33

H(33) -55* 998* 452* 30

H(34) -161* 812* 424* 31

H(35) -87* 572* 485* 32

H(36) -57* 877* 537* 30

H(37) -167* 1165* 412* 32

H(38) -251* 1130* 467* 37

H(39) -169* 910* 511* 33

Notes:

1) Fractional coordinates are X 10**4 for non-hydrogen atoms

and X 10**3 for hydrogen atoms. Biso values are X 10.

2) Isotropic values for those atoms refined anisotropically

are calculated using the formula given by W. C. Hamilton,

Acta Cryst., 12,609 (1959)

3) Parameters marked by an asterisk (*) were not varied.

Table S3: Anisotropic Thermal Parameters

Atom U11 U22 U33 U12 U13 U23

PT(1) 21.1(1) 32.4(1) 25.3(1) -1.6(1) 7* -5.9(1)

N(2) 25(1) 43(2) 25(1) -2(1) 7(1) -7(1)

C(3) 31(2) 77(3) 32(2) -4(2) 7(1) 6(2)

C(4) 36(2) 135(5) 26(2) 5(3) 9(2) -6(3)

C(5) 42(2) 94(4) 64(3) 17(3) 5(2) -38(3)

C(6) 39(2) 60(3) 63(3) 3(2) 0(2) -21(2)

C(7) 22(2) 45(2) 51(2) -3(1) 5(1) -10(2)

C(8) 35(2) 43(2) 82(3) -4(2) 16(2) 0(2)

C(9) 36(2) 39(2) 46(2) -1(2) 20(2) 0(2)

C(10) 46(2) 40(2) 58(2) 5(2) 29(2) 7(2)

C(11) 45(2) 57(2) 38(2) 16(2) 17(2) 15(2)

C(12) 36(2) 59(2) 29(2) 7(2) 9(1) 0(2)

C(13) 32(2) 48(2) 25(2) 3(2) 12(1) -6(1)

N(14) 27(1) 38(2) 30(1) 0(1) 13(1) -2(1)

C(15) 32(2) 56(2) 38(2) 5(2) -1(2) -17(2)

C(16) 30(2) 31(2) 59(2) 0(1) 14(2) -6(2)

C(17) 34(2) 39(2) 80(3) -2(2) 14(2) -3(2)

C(18) 42(2) 42(2) 100(4) 3(2) 25(2) 14(2)

C(19) 56(3) 63(3) 81(3) 23(2) 44(2) 36(2)

C(20) 38(2) 62(3) 52(2) 17(2) 23(2) 22(2)

N(21) 26(1) 39(2) 39(2) 5(1) 14(1) 6(1)

C(22) 59(3) 133(5) 43(2) 4(3) 26(2) 14(3)

C(23) 69(3) 102(5) 68(3) -21(3) 16(3) 8(3)

C(24) 32(2) 51(2) 35(2) -3(2) 8(1) -5(2)

C(25) 36(2) 41(2) 42(2) -1(2) 9(2) -10(2)

C(26) 38(2) 46(2) 53(2) -4(2) 18(2) 1(2)

C(27) 34(2) 55(2) 62(2) -2(2) 22(2) -8(2)

C(28) 40(2) 47(2) 51(2) 4(2) 19(2) -5(2)

C(29) 37(2) 54(2) 39(2) 3(2) 9(2) 2(2)

B(30) 22(2) 22(2) 27(2) -1(1) 9(1) 3(1)

C(31) 22(1) 23(1) 24(1) 3(1) 9(1) 2(1)

C(32) 23(1) 25(1) 24(1) 3(1) 10(1) 3(1)

C(33) 25(1) 24(1) 33(2) 1(1) 10(1) -1(1)

C(34) 39(2) 29(2) 27(2) 6(1) 7(1) -5(1)

C(35) 51(2) 34(2) 22(1) 15(2) 17(1) 6(1)

C(36) 36(2) 25(1) 33(2) 6(1) 20(1) 6(1)

C(37) 38(2) 31(2) 40(2) -5(1) 13(1) -2(1)

F(38) 100(2) 36(1) 50(1) -21(1) 19(1) 9(1)

F(39) 38(1) 61(2) 171(3) -14(1) 19(2) 41(2)

F(40) 146(3) 27(1) 92(2) -13(1) 78(2) -11(1)

C(41) 115(4) 43(2) 31(2) 26(3) 33(2) 9(2)

F(42) 71(2) 49(1) 33(1) 19(1) 22(1) 17(1)

F(43) 77(5) 98(6) 42(4) 45(4) 44(4) 30(3)

F(44) 92(4) 65(3) 22(2) -17(3) 8(2) 2(2)

C(45) 26(1) 20(1) 25(1) 0(1) 8(1) 0(1)

C(46) 24(1) 20(1) 31(2) 2(1) 8(1) -1(1)

C(47) 30(2) 24(1) 23(1) 1(1) 4(1) 1(1)

C(48) 34(2) 27(2) 26(2) 1(1) 12(1) 1(1)

C(49) 26(1) 24(1) 27(1) -1(1) 9(1) -3(1)

C(50) 25(1) 25(1) 22(1) -1(1) 5(1) 0(1)

C(51) 36(2) 37(2) 26(2) 7(1) 6(1) 5(1)

F(52) 90(2) 150(3) 42(1) 85(2) 3(1) 12(2)

F(53) 61(2) 103(2) 41(1) -27(1) -4(1) 37(1)

F(54) 73(2) 57(2) 37(1) -20(1) -17(1) 5(1)

C(55) 34(2) 36(2) 27(2) 0(1) 14(1) -2(1)

F(56) 40(1) 66(1) 60(1) 4(1) 32(1) 21(1)

F(57) 34(1) 58(1) 66(1) 5(1) 19(1) -25(1)

F(58) 24(1) 66(1) 29(1) -1(1) 7(1) 1(1)

C(59) 24(1) 26(2) 26(1) -2(1) 12(1) 4(1)

C(60) 25(1) 30(2) 25(1) -1(1) 9(1) 2(1)

C(61) 28(1) 25(1) 26(1) -5(1) 12(1) 0(1)

C(62) 32(2) 23(1) 32(2) -2(1) 15(1) 1(1)

C(63) 26(1) 28(2) 27(1) 0(1) 11(1) 4(1)

C(64) 24(1) 24(1) 28(1) -5(1) 10(1) 0(1)

C(65) 30(2) 30(2) 39(2) -4(1) 10(1) -2(1)

F(66) 53(1) 62(1) 33(1) -24(1) 13(1) -13(1)

F(67) 46(1) 26(1) 101(2) -7(1) -7(1) -11(1)

F(68) 42(1) 69(2) 55(1) -30(1) 28(1) -20(1)

C(69) 28(2) 30(2) 44(2) 1(1) 10(1) 2(1)

F(70) 26(1) 33(1) 93(2) -2(1) 11(1) 1(1)

F(71) 32(1) 28(1) 65(1) 5(1) 14(1) 0(1)

F(72) 47(1) 85(2) 37(1) 22(1) 3(1) 13(1)

C(73) 22(1) 26(2) 28(2) -3(1) 8(1) -4(1)

C(74) 28(2) 27(2) 29(2) 0(1) 10(1) -2(1)

C(75) 27(2) 32(2) 30(2) 1(1) 6(1) -9(1)

C(76) 24(2) 44(2) 36(2) 2(1) 8(1) -15(2)

C(77) 29(2) 39(2) 30(2) -7(1) 12(1) -10(1)

C(78) 26(2) 30(2) 31(2) -4(1) 10(1) -1(1)

C(79) 34(2) 41(2) 44(2) 12(2) 11(2) -5(2)

F(80) 156(3) 56(2) 50(2) 25(2) 0(2) 10(1)

F(81) 90(2) 83(2) 158(3) 55(2) 73(2) 45(2)

F(82) 59(2) 32(1) 146(3) -2(1) -7(2) 20(2)

C(83) 34(2) 54(2) 48(2) -6(2) 23(2) -8(2)

F(84) 38(1) 147(3) 92(2) 3(2) 39(1) 38(2)

F(85) 152(3) 48(2) 146(3) -34(2) 126(3) -20(2)

F(86) 75(2) 102(2) 34(1) -31(2) 20(1) 3(1)

C(87) 215(17) 74(8) 317(22) 0* 74(15) 0*

CL(88) 106(2) 53(1) 83(2) 10(1) 61(2) -13(1)

CL(89) 99(2) 66(2) 108(2) -5(2) 61(2) -11(2)

F(90) 126(6) 44(3) 28(3) 14(4) 33(4) -3(2)

F(91) 50(3) 110(5) 33(3) -18(3) 19(2) 18(3)

Form of the anisotropic thermal parameter:

exp[-2pi**2)[(h**2)((a*)**2)U11+(k**2)((b*)**2)U22+(l**2)((c*)**2)U33 +2hk(a*)(b*)U12+2hl(a*)(c*)U13+2kl(b*)(c*)U23]]

All values are X 10**3

Table S4: Bond Distances and Angles

A B Distance A B Distance

PT(1) N(2) 2.1977(26) C(8) C(9) 1.526(5)

PT(1) N(14) 2.2209(27) C(9) C(10) 1.381(5)

PT(1) N(21) 2.2209(26) C(10) C(11) 1.379(5)

PT(1) C(24) 2.098(3) C(11) C(12) 1.375(5)

PT(1) C(25) 2.077(3) C(12) C(13) 1.368(5)

CL(88) CL(89) 1.161(4) C(13) C(15) 1.535(5)

CL(88) C(87) 2.054(5) C(15) C(16) 1.535(5)

CL(89) CL(89) 2.030(6) C(16) C(17) 1.366(5)

CL(89) C(87) 1.379(8) C(17) C(18) 1.360(6)

F(38) C(37) 1.320(4) C(18) C(19) 1.356(6)

F(39) C(37) 1.303(4) C(19) C(20) 1.418(5)

F(40) C(37) 1.334(4) C(20) C(22) 1.458(6)

F(42) C(41) 1.285(4) C(22) C(23) 1.421(8)

F(43) F(90) 1.045(8) C(24) C(25) 1.443(5)

F(43) F(91) 1.139(8) C(24) C(29) 1.485(5)

F(43) C(41) 1.169(6) C(25) C(26) 1.531(5)

F(44) F(90) 1.291(8) C(26) C(27) 1.537(5)

F(44) C(41) 1.572(7) C(27) C(28) 1.493(5)

F(52) C(51) 1.324(4) C(28) C(29) 1.527(5)

F(53) C(51) 1.303(4) C(31) C(32) 1.400(4)

F(54) C(51) 1.312(4) C(31) C(36) 1.401(4)

F(56) C(55) 1.340(4) C(31) B(30) 1.637(4)

F(57) C(55) 1.330(4) C(32) C(33) 1.374(4)

F(58) C(55) 1.329(3) C(33) C(34) 1.388(4)

F(66) C(65) 1.337(4) C(33) C(37) 1.489(4)

F(67) C(65) 1.330(4) C(34) C(35) 1.369(5)

F(68) C(65) 1.325(4) C(35) C(36) 1.378(4)

F(70) C(69) 1.343(4) C(35) C(41) 1.489(5)

F(71) C(69) 1.332(4) C(45) C(46) 1.393(4)

F(72) C(69) 1.351(4) C(45) C(50) 1.408(4)

F(80) C(79) 1.313(4) C(45) B(30) 1.637(4)

F(81) C(79) 1.327(4) C(46) C(47) 1.403(4)

F(82) C(79) 1.259(4) C(47) C(48) 1.382(4)

F(84) C(83) 1.328(4) C(47) C(51) 1.501(4)

F(85) C(83) 1.311(4) C(48) C(49) 1.388(4)

F(86) C(83) 1.301(4) C(49) C(50) 1.377(4)

F(90) C(41) 1.244(6) C(49) C(55) 1.493(4)

F(91) C(41) 1.580(7) C(59) C(60) 1.403(4)

N(2) C(3) 1.336(4) C(59) C(64) 1.403(4)

N(2) C(7) 1.351(4) C(59) B(30) 1.632(4)

N(14) C(9) 1.347(4) C(60) C(61) 1.386(4)

N(14) C(13) 1.352(4) C(61) C(62) 1.390(4)

N(21) C(16) 1.354(4) C(61) C(65) 1.491(4)

N(21) C(20) 1.328(4) C(62) C(63) 1.380(4)

C(3) C(4) 1.437(6) C(63) C(64) 1.392(4)

C(3) C(23) 1.455(7) C(63) C(69) 1.485(4)

C(4) C(5) 1.351(7) C(73) C(74) 1.405(4)

C(5) C(6) 1.354(7) C(73) C(78) 1.401(4)

C(6) C(7) 1.334(5) C(73) B(30) 1.634(4)

C(7) C(8) 1.577(6) C(74) C(75) 1.384(4)

C(75) C(76) 1.382(5)

C(75) C(79) 1.500(5)

C(76) C(77) 1.390(5)

C(77) C(78) 1.379(4)

C(77) C(83) 1.488(5)

C(4) H(1) .936(4)

C(5) H(2) .952(4)

C(6) H(3) .963(5)

C(8) H(4) .953(4)

C(8) H(5) .963(4)

C(10) H(6) .951(4)

C(11) H(7) .950(3)

C(12) H(8) .946(4)

C(15) H(9) .945(3)

C(15) H(10) .950(4)

C(17) H(11) .940(4)

C(18) H(12) .953(4)

C(19) H(13) .953(4)

C(22) H(14) .977(5)

C(22) H(15) .945(5)

C(23) H(16) .940(5)

C(23) H(17) .969(6)

C(24) H(18) .954(3)

C(25) H(19) .952(4)

C(26) H(20) .954(4)

C(26) H(21) .945(4)

C(27) H(22) .951(4)

C(27) H(23) .951(4)

C(28) H(24) .967(4)

C(28) H(25) .945(4)

C(29) H(26) .943(4)

C(29) H(27) .956(4)

C(32) H(28) .9476(27)

C(34) H(29) .946(3)

C(36) H(30) .949(3)

C(46) H(31) .946(3)

C(48) H(32) .948(3)

C(50) H(33) .946(3)

C(60) H(34) .946(3)

C(62) H(35) .945(3)

C(64) H(36) .9464(28)

C(74) H(37) .950(3)

C(76) H(38) .949(3)

C(78) H(39) .946(3)

N(2) PT(1) N(14) 84.92(10)

N(2) PT(1) N(21) 90.07(10)

N(2) PT(1) C(24) 93.30(12)

N(2) PT(1) C(25) 91.44(12)

N(14) PT(1) N(21) 82.08(10)

N(14) PT(1) C(24) 159.27(12)

N(14) PT(1) C(25) 118.87(13)

N(21) PT(1) C(24) 118.61(12)

N(21) PT(1) C(25) 159.04(13)

C(24) PT(1) C(25) 40.43(14)

CL(89) CL(88) C(87) 39.8(3)

CL(88) CL(89) CL(89) 127.4(3)

CL(88) CL(89) C(87) 107.6(4)

CL(89) CL(89) C(87) 42.6(4)

F(90) F(43) F(91) 153.1(8)

F(90) F(43) C(41) 68.1(5)

F(91) F(43) C(41) 86.4(6)

F(90) F(44) C(41) 50.3(3)

F(43) F(90) F(44) 135.0(7)

F(43) F(90) C(41) 60.7(5)

F(44) F(90) C(41) 76.7(5)

F(43) F(91) C(41) 47.6(3)

PT(1) N(2) C(3) 125.42(26)

PT(1) N(2) C(7) 116.35(23)

C(3) N(2) C(7) 118.2(3)

PT(1) N(14) C(9) 117.51(22)

PT(1) N(14) C(13) 123.29(23)

C(9) N(14) C(13) 119.0(3)

PT(1) N(21) C(16) 121.79(23)

PT(1) N(21 C(20) 118.7(3)

N(2) C(3) C(4) 119.7(4)

N(2) C(3) C(23) 128.6(4)

C(4) C(3) C(23) 111.7(4)

C(3) C(4) C(5) 118.3(4)

C(4) C(5) C(6) 121.0(4)

C(5) C(6) C(7) 118.7(5)

N(2) C(7) C(6) 124.0(4)

N(2) C(7) C(8) 116.3(3)

C(6) C(7) C(8) 119.6(4)

C(7) C(8) C(9) 112.8(3)

N(14) C(9) C(8) 115.3(3)

N(14) C(9) C(10) 121.5(3)

C(8) C(9) C(10) 123.2(3)

C(9) C(10) C(11) 119.2(3)

C(10) C(11) C(12) 119.2(3)

C(11) C(12) C(13) 119.6(3)

N(14) C(13) C(12) 121.7(3)

N(14) C(13) C(15) 115.4(3)

C(12) C(13) C(15) 122.8(3)

C(13) C(15) C(16) 111.9(3)

N(21) C(16) C(15) 117.0(3)

N(21) C(16) C(17) 122.9(4)

C(15) C(16) C(17) 120.0(3)

C(16) C(17) C(18) 117.6(4)

C(17) C(18) C(19) 122.0(4)

C(18) C(19) C(20) 117.5(4)

N(21) C(20) C(19) 121.2(4)

N(21) C(20) C(22) 118.0(3)

C(19) C(20) C(22) 120.7(4)

C(20) C(22) C(23) 117.8(5)

C(3) C(23) C(22) 123.3(5)

PT(1) C(24) C(25) 68.98(19)

PT(1) C(24) C(29) 122.70(25)

C(25) C(24) C(29) 121.5(3)

PT(1) C(25) C(24) 70.58(20)

PT(1) C(25) C(26) 120.66(24)

C(24) C(25) C(26) 121.1(3)

C(25) C(26) C(27) 110.8(3)

C(26) C(27) C(28) 112.2(3)

C(27) C(28) C(29) 109.6(3)

C(24) C(29) C(28) 113.7(3)

C(32) C(31) C(36) 115.65(26)

C(32) C(31) B(30) 121.63(25)

C(36) C(31) B(30) 122.14(25)

C(31) C(32) C(33) 122.26(27)

C(32) C(33) C(34) 120.7(3)

C(32) C(33) C(37) 120.95(28)

C(34) C(33) C(37) 118.31(28)

C(33) C(34) C(35) 118.1(3)

C(34) C(35) C(36) 121.4(3)

C(34) C(35) C(41) 119.9(3)

C(36) C(35) C(41) 118.7(3)

C(31) C(36) C(35) 121.85(28)

F(38) C(37) F(39) 105.6(3)

F(38) C(37) F(40) 104.4(3)

F(38) C(37) C(33) 114.00(27)

F(39) C(37) F(40) 106.0(3)

F(39) C(37) C(33) 113.3(3)

F(40) C(37) C(33) 112.74(28)

F(42) C(41) F(43) 118.4(5)

F(42) C(41) F(44) 89.3(4)

F(42) C(41) F(90) 121.1(4)

F(42) C(41) F(91) 92.3(4)

F(42) C(41) C(35) 115.5(3)

F(43) C(41) F(44) 103.0(6)

F(43) C(41) F(90) 51.2(4)

F(43) C(41) F(91) 46.0(5)

F(43) C(41) C(35) 118.1(4)

F(44) C(41) F(90) 53.0(4)

F(44) C(41) F(91) 144.2(4)

F(44) C(41) C(35) 105.7(4)

F(90) C(41) F(91) 96.9(6)

F(90) C(41) C(35) 117.4(4)

F(91) C(41) C(35) 105.7(4)

C(46) C(45) C(50) 115.90(27)

C(46) C(45) B(30) 125.89(26)

C(50) C(45) B(30) 118.04(25)

C(45) C(46) C(47) 121.48(27)

C(46) C(47) C(48) 121.02(27)

C(46) C(47) C(51) 119.2(3)

C(48) C(47) C(51) 119.7(3)

C(47) C(48) C(49) 118.30(28)

C(48) C(49) C(50) 120.50(28)

C(48) C(49) C(55) 118.44(27)

C(50) C(49) C(55) 120.94(26)

C(45) C(50) C(49) 122.75(27)

F(52) C(51) F(53) 106.3(3)

F(52) C(51) F(54) 104.3(3)

F(52) C(51) C(47) 112.36(28)

F(53) C(51) F(54) 108.3(3)

F(53) C(51) C(47) 113.5(3)

F(54) C(51) C(47) 111.57(26)

F(56) C(55) F(57) 105.82(26)

F(56) C(55) F(58) 106.42(26)

F(56) C(55) C(49) 112.92(27)

F(57) C(55) F(58) 106.58(27)

F(57) C(55) C(49) 111.33(26)

F(58) C(55) C(49) 113.26(25)

C(60) C(59) C(64) 115.49(26)

C(60) C(59) B(30) 121.50(25)

C(64) C(59) B(30) 122.15(25)

C(59) C(60) C(61) 122.45(27)

C(60) C(61) C(62) 120.64(27)

C(60) C(61) C(65) 118.97(27)

C(62) C(61) C(65) 120.33(27)

C(61) C(62) C(63) 118.37(28)

C(62) C(63) C(64) 120.73(27)

C(62) C(63) C(69) 119.44(28)

C(64) C(63) C(69) 119.82(27)

C(59) C(64) C(63) 122.29(27)

F(66) C(65) F(67) 105.72(28)

F(66) C(65) F(68) 105.33(26)

F(66) C(65) C(61) 112.51(26)

F(67) C(65) F(68) 107.07(28)

F(67) C(65) C(61) 113.29(26)

F(68) C(65) C(61) 112.33(27)

F(70) C(69) F(71) 106.12(26)

F(70) C(69) F(72) 105.74(28)

F(70) C(69) C(63) 113.32(27)

F(71) C(69) F(72) 105.31(27)

F(71) C(69) C(63) 113.47(27)

F(72) C(69) C(63) 112.20(27)

C(74) C(73) C(78) 115.18(27)

C(74) C(73) B(30) 122.28(27)

C(78) C(73) B(30) 121.53(27)

C(73) C(74) C(75) 122.4(3)

C(74) C(75) C(76) 120.7(3)

C(74) C(75) C(79) 118.5(3)

C(76) C(75) C(79) 120.8(3)

C(75) C(76) C(77) 118.4(3)

C(76) C(77) C(78) 120.4(3)

C(76) C(77) C(83) 120.3(3)

C(78) C(77) C(83) 119.2(3)

C(73) C(78) C(77) 122.9(3)

F(80) C(79) F(81) 102.1(3)

F(80) C(79) F(82) 108.5(4)

F(80) C(79) C(75) 111.6(3)

F(81) C(79) F(82) 107.0(3)

F(81) C(79) C(75) 112.1(3)

F(82) C(79) C(75) 114.5(3)

F(84) C(83) F(85) 105.4(3)

F(84) C(83) F(86) 104.7(3)

F(84) C(83) C(77) 113.2(3)

F(85) C(83) F(86) 107.6(4)

F(85) C(83) C(77) 112.3(3)

F(86) C(83) C(77) 113.1(3)

CL(88) C(87) CL(88) 141.1(7)

CL(88) C(87) CL(89) 32.63(16)

CL(88) C(87) CL(89) 113.0(7)

CL(88) C(87) CL(89) 32.63(16)

CL(89) C(87) CL(89) 94.8(8)

C(31) B(30) C(45) 110.33(23)

C(31) B(30) C(59) 113.73(24)

C(31) B(30) C(73) 102.57(24)

C(45) B(30) C(59) 102.72(23)

C(45) B(30) C(73) 114.86(25)

C(59) B(30) C(73) 113.01(24)

C(3) C(4) H(1) 121.3(6)

C(5) C(4) H(1) 120.4(6)

C(4) C(5) H(2) 121.4(6)

C(6) C(5) H(2) 117.7(6)

C(5) C(6) H(3) 121.2(5)

C(7) C(6) H(3) 120.2(5)

C(7) C(8) H(4) 110.8(4)

C(7) C(8) H(5) 110.2(4)

C(9) C(8) H(4) 107.7(4)

C(9) C(8) H(5) 107.1(4)

H(4) C(8) H(5) 108.0(4)

C(9) C(10) H(6) 120.0(4)

C(11) C(10) H(6) 120.8(4)

C(10) C(11) H(7) 120.6(4)

C(12) C(11) H(7) 120.3(4)

C(11) C(12) H(8) 120.2(4)

C(13) C(12) H(8) 120.3(4)

C(13) C(15) H(9) 108.8(3)

C(13) C(15) H(10) 108.5(3)

C(16) C(15) H(9) 109.2(4)

C(16) C(15) H(10) 108.8(3)

H(9) C(15) H(10) 109.6(4)

C(16) C(17) H(11) 121.9(5)

C(18) C(17) H(11) 120.5(4)

C(17) C(18) H(12) 118.8(5)

C(19) C(18) H(12) 119.2(5)

C(18) C(19) H(13) 118.6(5)

C(20) C(19) H(13) 123.8(5)

C(20) C(22) H(14) 106.7(5)

C(20) C(22) H(15) 108.9(4)

C(23) C(22) H(14) 107.5(4)

C(23) C(22) H(15) 108.0(6)

H(14) C(22) H(15) 107.5(5)

C(3) C(23) H(16) 107.7(5)

C(3) C(23) H(17) 105.9(5)

C(22) C(23) H(16) 106.5(6)

C(22) C(23) H(17) 104.4(5)

H(16) C(23) H(17) 108.4(6)

PT(1) C(24) H(18) 112.48(27)

C(25) C(24) H(18) 112.4(4)

C(29) C(24) H(18) 112.3(3)

PT(1) C(25) H(19) 112.91(27)

C(24) C(25) H(19) 113.0(3)

C(26) C(25) H(19) 112.5(3)

C(25) C(26) H(20) 108.7(3)

C(25) C(26) H(21) 109.3(4)

C(27) C(26) H(20) 108.9(4)

C(27) C(26) H(21) 109.8(3)

H(20) C(26) H(21) 109.4(4)

C(26) C(27) H(22) 108.9(4)

C(26) C(27) H(23) 108.7(4)

C(28) C(27) H(22) 109.4(4)

C(28) C(27) H(23) 108.3(4)

H(22) C(27) H(23) 109.2(3)

C(27) C(28) H(24) 108.7(4)

C(27) C(28) H(25) 110.2(3)

C(29) C(28) H(24) 109.5(3)

C(29) C(28) H(25) 110.6(4)

H(24) C(28) H(25) 108.3(4)

C(24) C(29) H(26) 109.3(3)

C(24) C(29) H(27) 108.4(3)

C(28) C(29) H(26) 108.0(3)

C(28) C(29) H(27) 108.1(3)

H(26) C(29) H(27) 109.4(4)

C(31) C(32) H(28) 118.8(3)

C(33) C(32) H(28) 119.0(3)

C(33) C(34) H(29) 120.8(3)

C(35) C(34) H(29) 121.1(3)

C(31) C(36) H(30) 118.8(3)

C(35) C(36) H(30) 119.4(3)

C(45) C(46) H(31) 119.2(3)

C(47) C(46) H(31) 119.3(3)

C(47) C(48) H(32) 120.7(3)

C(49) C(48) H(32) 121.0(3)

C(45) C(50) H(33) 118.5(3)

C(49) C(50) H(33) 118.8(3)

C(59) C(60) H(34) 118.7(3)

C(61) C(60) H(34) 118.9(3)

C(61) C(62) H(35) 120.9(3)

C(63) C(62) H(35) 120.7(3)

C(59) C(64) H(36) 118.8(3)

C(63) C(64) H(36) 118.9(3)

C(73) C(74) H(37) 118.9(3)

C(75) C(74) H(37) 118.7(3)

C(75) C(76) H(38) 120.6(4)

C(77) C(76) H(38) 121.0(4)

C(73) C(78) H(39) 118.5(3)

C(77) C(78) H(39) 118.6(3)
